# Supplementary material
Source: Elsevier journal article supplement (https://www.sciencedirect.com/science/article/pii/S0213911119301554)
Supplement: mmc1 [file S0213911119301554:mmc1.docx]

**Appendix**

**Table I**

Linear regression models for panel data, including the explanatory variables: age group, period (t1: pre-recession versus t2: recession) and the interaction between year and period. Spain, 1998-2013.

| **Age group** | **Periods** | **Coefficient** | **Standard error** | **t** | **P>t** | **95% confidence interval** | |
| --- | --- | --- | --- | --- | --- | --- | --- |
|  |  |  |  |  |  |  |  |
| 15-19 | t1 | 0,080904 | 0,0429713 | 1,88 | 0,078 | −0,0101911 | 0,1719991 |
|  | t2 | 4,80174 | 0,8372628 | 5,74 | 0,000 | 3,026822 | 6,576658 |
|  | interaction | −0,4337013 | 0,0751029 | −5,77 | 0,000 | −0,5929124 | −0,2744902 |
|  | t1-interaction | −0,3527974 | 0,0739714 | −4,77 | 0,000 | −0,5096097 | −0,195985 |
|  |  |  |  |  |  |  |  |
| 20-24 | t1 | −0,0578999 | 0,0884172 | −0,65 | 0,522 | −0,2453359 | 0,1295361 |
|  | t2 | 8,686245 | 1,393589 | 6,23 | 0,000 | 5,731968 | 11,64052 |
|  | interaction | −0,7013846 | 0,1218081 | −5,76 | 0,000 | −0,9596062 | −0,4431629 |
|  | t1-interaction | −0,7592845 | 0,1141759 | −6,65 | 0,000 | −1,001327 | −0,5172424 |
|  |  |  |  |  |  |  |  |
| 25-29 | t1 | −1,144164 | 0,1438624 | −7,95 | 0,000 | −1,449139 | −0,8391896 |
|  | t2 | 4,478635 | 2,577403 | 1,74 | 0,101 | −0,9852143 | 9,942485 |
|  | interaction | −0,3358573 | 0,2132571 | −1,57 | 0,135 | −0,7879421 | 0,1162276 |
|  | t1-interaction | −1,480022 | 0,1733617 | −8,54 | 0,000 | −1,847532 | −1,112511 |
|  |  |  |  |  |  |  |  |
| 30-34 | t1 | 1,454987 | 0,1408895 | 10,33 | 0,000 | 1,156315 | 1,75366 |
|  | t2 | 32,25873 | 2,67014 | 12,08 | 0,000 | 26,59829 | 37,91918 |
|  | interaction | −3,199876 | 0,2257455 | −14,17 | 0,000 | −3,678435 | −2,721317 |
|  | t1-interaction | −1,744888 | 0,1414925 | −12,33 | 0,000 | −2,044839 | −1,444938 |
|  |  |  |  |  |  |  |  |
| 35-39 | t1 | 2,409373 | 0,1268374 | 19 | 0,000 | 2,14049 | 2,678256 |
|  | t2 | 21,37771 | 2,218278 | 9,64 | 0,000 | 16,67517 | 26,08025 |
|  | Interaction | −1,777072 | 0,1871386 | −9,5 | 0,000 | −2,173788 | −1,380356 |
|  | t1-interaction | 0,6323009 | 0,1659391 | 3,81 | 0,002 | 0,2805257 | 0,984076 |
|  |  |  |  |  |  |  |  |
| 40-44 | t1 | 0,4725908 | 0,0388147 | 12,18 | 0,000 | 0,3903074 | 0,5548742 |
|  | t2 | −4,399482 | 0,6933273 | −6,35 | 0,000 | −5,869271 | −2,929694 |
|  | Interaction | 0,3790632 | 0,0498352 | 7,61 | 0,000 | 0,2734174 | 0,4847091 |
|  | t1-interaction | 0,8516541 | 0,0575454 | 14,8 | 0,000 | 0,7296633 | 0,9736448 |
|  |  |  |  |  |  |  |  |
| 45-49 | t1 | 0,0386283 | 0,002854 | 13,53 | 0,000 | 0,032578 | 0,0446786 |
|  | t2 | 0,2610902 | 0,1350798 | 1,93 | 0,071 | −0,0252663 | 0,5474467 |
|  | Interaction | −0,0132396 | 0,0099452 | −1,33 | 0,202 | −0,0343226 | 0,0078434 |
|  | t1-interaction | 0,0253886 | 0,0099157 | 2,56 | 0,021 | 0,0043683 | 0,046409 |
|  |  |  |  |  |  |  |  |
| 15-49 | t1 | 0,5278435 | 0,0638854 | 8.26 | 0.000 | 0,3924126 | 0,6632744 |
|  | t2 | 10,217 | 0,9771743 | 10.46 | 0.000 | 8,145 | 12,288 |
|  | Interaction | −0,924167 | 0,0828077 | −11.16 | 0.000 | −1,100 | −0,749 |
|  | t1-interaction | −0,3963235 | 0,0670599 | -5,91 | 0.000 | −0,5384841 | −0,2541629 |

**Table II**

Linear regression models for panel data, including the explanatory variables: autonomous regions grouped by quartile of unemployment, period (t1: pre-recession versus t2: recession), and the interaction between year and period in 15-49 women age group Spain, 1998-2013.

| **Unemployment quartiles** | **Periods** | **Coefficient** | **Standard error** | **t** | **P>t** | **95% confidence interval** | |
| --- | --- | --- | --- | --- | --- | --- | --- |
| Q1 (lowest unemployment levels | t1 | 0,817873 | 0,1124356 | 7,27 | 0,005 | 0,4600527 | 1,175693 |
| t2 | 14,23226 | 1,767104 | 8,05 | 0,004 | 8,60855 | 19,85598 |
| Interaction | −1,242089 | 0,1536997 | −8,08 | 0,004 | −1,73123 | −0,7529483 |
| t1-interaction | −0,4242164 | 0,1132813 | −3,74 | 0,033 | −0,784728 | −0,0637048 |
|  |  |  |  |  |  |  |
| Q2 | t1 | 0,6811958 | 0,1134559 | 6 | 0,009 | 0,3201284 | 1,042263 |
|  | t2 | 12,3661 | 2,801299 | 4,41 | 0,022 | 3,451114 | 21,28108 |
|  | Interaction | −1,090924 | 0,26682 | −4,09 | 0,026 | −1,940065 | −0,241784 |
|  | t1-interaction | −0,4097284 | 0,1564106 | −2,62 | 0,079 | −0,9074968 | 0,0880399 |
|  |  |  |  |  |  |  |  |
| Q3 | t1 | 0,4461651 | 0,244985 | 1,82 | 0,166 | −0,3334865 | 1,225817 |
|  | t2 | 14,51329 | 3,163593 | 4,59 | 0,019 | 4,44532 | 24,58125 |
|  | Interaction | −1,267584 | 0,290736 | −4,36 | 0,022 | −2,192836 | −0,3423329 |
|  | t1-interaction | −0,8214193 | 0,1115213 | −7,37 | 0,005 | −1,17633 | −0,4665087 |
|  |  |  |  |  |  |  |  |
| Q4 (highest unemployment levels | t1 | 0,2249596 | 0,1964453 | 1,15 | 0,316 | −0,3204599 | 0,7703791 |
| t2 | 11,29905 | 2,592705 | 4,36 | 0,012 | 4,100551 | 18,49756 |
| Interaction | −1,077101 | 0,2338104 | −4,61 | 0,01 | −1,726263 | −0,4279394 |
| t1-interaction | −0,8521416 | 0,0536727 | −15,88 | 0 | −1,001161 | −0,7031222 |

**Table III**

Linear regression models for panel data, including the explanatory variables: Autonomous regions in the lowest and highest quartile of unemployment, period (t1: pre-recession versus t2: recession), and the interaction between year and period in 30-34 women age group Spain, 1998-2013.

| **Unemployment quartiles** | **Autonomous Regions** | **Periods** | **Coefficient** | **Standard error** | **t** | **P>t** | **95% confidence interval** | |
| --- | --- | --- | --- | --- | --- | --- | --- | --- |
| Q1 (lowest unemployment levels) | Basque Country | t1 | 1,705816 | 0,3082987 | 5,53 | 0,000 | 1,034091 | 2,377541 |
|  | t2 | 28,6694 | 12,79802 | 2,24 | 0,045 | 0,7849074 | 56,5539 |
|  | Interaction | −2,683488 | 0,9612237 | −2,79 | 0,016 | −4,777815 | −0,5891614 |
|  | t1-interaction | −0,9776718 | 0,9104411 | −1,07 | 0,304 | −2,961353 | 1,006009 |
|  |  |  |  |  |  |  |  |
| Navarra | t1 | 1,522895 | 0,2533207 | 6,01 | 0,000 | 0,9709571 | 2,074834 |
|  | t2 | 29,02321 | 9,968228 | 2,91 | 0,013 | 7,304303 | 50,74211 |
|  | Interaction | −3,135233 | 0,7967036 | −3,94 | 0,002 | −4,871101 | −1,399365 |
|  | t1-interaction | −1,612337 | 0,7553577 | −2,13 | 0,054 | −3,25812 | 0,0334455 |
|  |  |  |  |  |  |  |  |
| La Rioja | t1 | 1,008262 | 0,3442913 | 2,93 | 0,013 | 0,2581153 | 1,758408 |
|  | t2 | 22,29661 | 9,470549 | 2,35 | 0,036 | 1,662057 | 42,93117 |
|  | Interaction | −2,343345 | 0,8099752 | −2,89 | 0,013 | −4,10813 | −0,5785611 |
|  | t1-interaction | −1,335084 | 0,7331598 | −1,82 | 0,094 | −2,932502 | 0,2623341 |
|  |  |  |  |  |  |  |  |
| Cantabria | t1 | 2,16135 | 0,4413047 | 4,9 | 0,000 | 1,19983 | 3,12287 |
|  | t2 | 40,92498 | 3,979688 | 10,28 | 0,000 | 32,25399 | 49,59598 |
|  | Interaction | −3,842084 | 0,487701 | −7,88 | 0,000 | −4,904693 | −2,779475 |
|  | t1-interaction | −1,680734 | 0,2076112 | −8,1 | 0,000 | −2,13308 | −1,228388 |
|  |  |  |  |  |  |  |  |
| Q4 (highest unemployment levels) | Andalucía | t1 | 2,046404 | 0,1682972 | 12,16 | 0,000 | 1,679716 | 2,413092 |
|  | t2 | 39,82976 | 3,248228 | 12,26 | 0,000 | 32,75248 | 46,90704 |
|  | Interaction | −4,135427 | 0,2871655 | −14,4 | 0,000 | −4,761107 | −3,509747 |
|  | t1-interaction | −2,089024 | 0,2326802 | −8,98 | 0,000 | −2,59599 | −1,582057 |
|  |  |  |  |  |  |  |  |
| Murcia | t1 | 1,732648 | 0,3298464 | 5,25 | 0,000 | 1,013975 | 2,451322 |
|  | t2 | 40,76348 | 4,393596 | 9,28 | 0,000 | 31,19066 | 50,33631 |
|  | Interaction | −3,945349 | 0,4375949 | −9,02 | 0,000 | −4,898786 | −2,991911 |
|  | t1-interaction | −2,212701 | 0,2875598 | −7,69 | 0,000 | −2,83924 | −1,586162 |
|  |  |  |  |  |  |  |  |
| Extremadura | t1 | 2,032594 | 0,2284854 | 8,9 | 0,000 | 1,534767 | 2,53042 |
|  | t2 | 53,61377 | 6,772573 | 7,92 | 0,000 | 38,8576 | 68,36994 |
|  | Interaction | −4,694209 | 0,5601122 | −8,38 | 0,000 | −5,914589 | −3,47383 |
|  | t1-interaction | −2,661616 | 0,5113904 | -5,2 | 0,000 | −3,77584 | −1,547392 |
|  |  |  |  |  |  |  |  |
| Comunidad Valenciana | t1 | 1,869192 | 0,225002 | 8,31 | 0,000 | 1,378955 | 2,359429 |
|  | t2 | 30,67618 | 10,38337 | 2,95 | 0,012 | 8,052757 | 53,2996 |
|  | Interaction | −3,502259 | 0,7857605 | −4,46 | 0,001 | −5,214284 | −1,790234 |
|  | t1-interaction | 90,78286 | 1,471315 | 61,7 | 0,000 | 87,57714 | 93,98858 |
